# Supplementary material for: Facile fabrication of Si/Sb/Sb2O3/G@C composite electrodes for high-performance Li-ion batteries
Source: Royal Society of Chemistry journal article supplement (doi:10.1039/c9nj05852d), 2020-01-01
Supplement: c9nj05852d1.pdf [file c9nj05852d1.pdf]

## Supplementary information

### **Facile Fabrication of Si/Sb/Sb<sub>2</sub>O<sub>3</sub>/G@C Composite Electrodes for High-Performance Li-Ion Batteries**

*Feiyuan Sun,<sup>a</sup> Hao Feng,<sup>a</sup> Shilun Gao,<sup>a</sup> Dandan Yang,<sup>\*b</sup> and Huabin Yang<sup>\*a,c</sup>*

<sup>a</sup> Institute of New Energy Material Chemistry, School of Materials Science and Engineering, Nankai University, Tianjin 300350, China.

<sup>b</sup> Experimental Teaching Center of Materials Science, School of Materials Science and Engineering, Nankai University, Tianjin 300350, China.

<sup>c</sup> Tianjin Key Laboratory of Metal and Molecule Based Material Chemistry, School of Materials Science and Engineering, Nankai University, Tianjin 300350, China.

[\*] Dandan Yang: [ddyang@nankai.edu.cn](mailto:ddyang@nankai.edu.cn); Huabin Yang: [hb\\_yang@nankai.edu.cn](mailto:hb_yang@nankai.edu.cn)

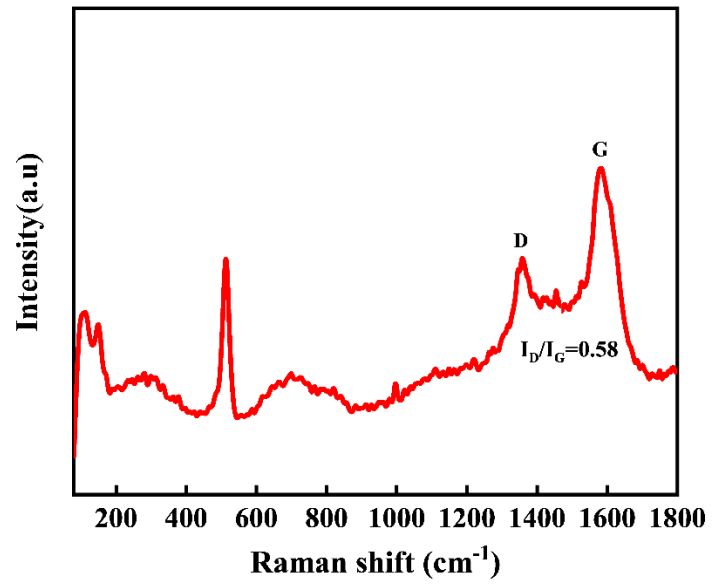

Fig. S1. Raman spectra of the Si/Sb/Sb<sub>2</sub>O<sub>3</sub>/G@C composite material.

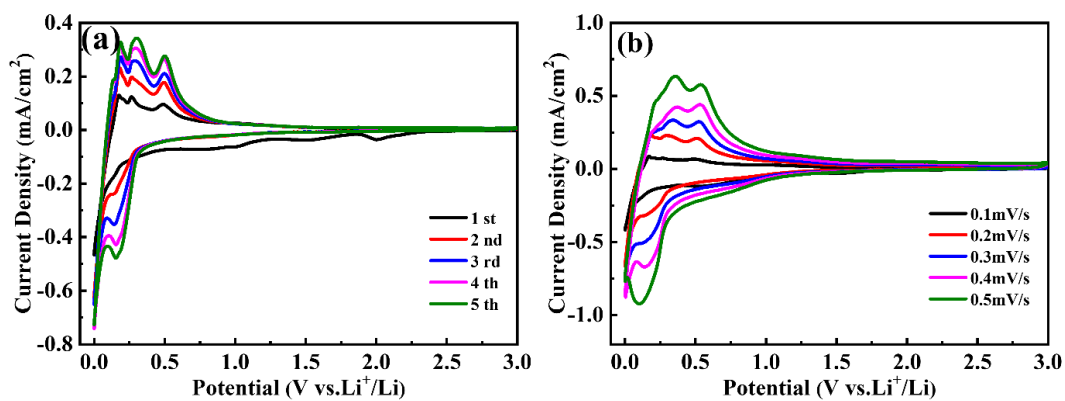

Fig. S2. Cyclic voltammetry (CV) curves of the Si/G@C electrode in the initial 5 cycles (a) and at different scanning speed (b).

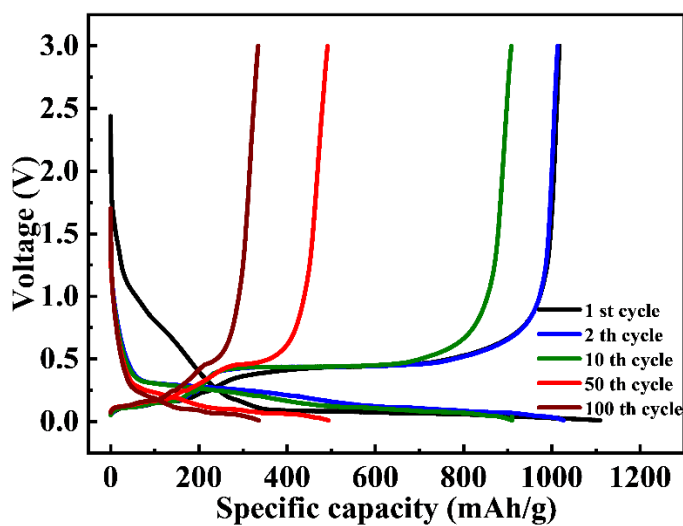

Fig. S3. Galvanostatic charge-discharge profiles of the Si/G@C electrode at different cycles.

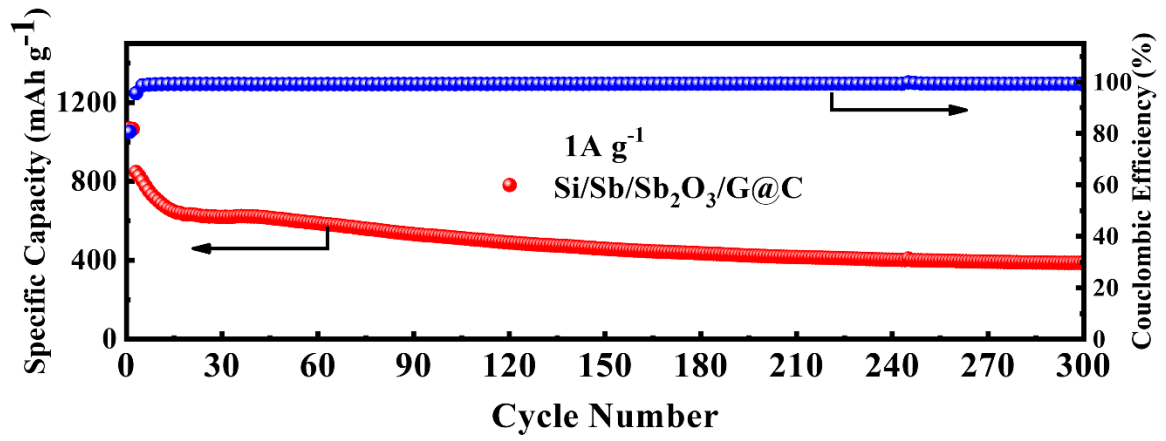

Fig. S4. Cycling performance and Coulombic efficiency of Si/Sb/Sb<sub>2</sub>O<sub>3</sub>/G@C electrode at the high current density of 1C (1C=1000 mA g<sup>-1</sup>).
